# Supplementary material for: “I’m Hooked on e-cycling, I Can Finally Be Active Again”: Perceptions of e-cycling as a Physical Activity Intervention during Breast Cancer Treatment
Source: MDPI journal article supplement (doi:10.3390/ijerph20065197), 2023-03-15
Supplement: s1 [file s1]

## Supplementary Materials

### S1. One-to-One Interview Guide

#### TOPIC GUIDE ONE

|                                      |                                                                                                                                                                                                                                                                                                                                                                                                                                                                                                                                                                                                                                                                                     |
|--------------------------------------|-------------------------------------------------------------------------------------------------------------------------------------------------------------------------------------------------------------------------------------------------------------------------------------------------------------------------------------------------------------------------------------------------------------------------------------------------------------------------------------------------------------------------------------------------------------------------------------------------------------------------------------------------------------------------------------|
| Welcome;<br>introduction;<br>consent | <ul style="list-style-type: none"> <li>- Thank you for taking part</li> <li>- Remind participant that interview is recorded; <b>start recording.</b></li> <li>- Explain purpose of interview: to explore opinions relating to physical activity during cancer treatment, in particular an e-bike intervention</li> <li>- Withdrawal without penalty (except 21 days after final interview)</li> </ul> <p><b>HOW DID YOU HEAR ABOUT THIS STUDY?</b></p>                                                                                                                                                                                                                              |
| Warm up                              | <ul style="list-style-type: none"> <li>- Ask about day / plans for the week</li> </ul>                                                                                                                                                                                                                                                                                                                                                                                                                                                                                                                                                                                              |
| Cancer<br>Journey                    | <p><b>If they are comfortable</b>, discuss their cancer journey</p> <ul style="list-style-type: none"> <li>○ Just to check, would you be comfortable speaking to me about your cancer journey in slightly more detail than the initial survey?</li> <li>- Tell me about your cancer journey <ul style="list-style-type: none"> <li>○ How far along [first diagnosis, relapse etc.]?</li> <li>○ Undergoing treatment [how long for / left to go]?</li> <li>○ If treatment ended, how long ago?</li> </ul> </li> <li>- Explain to me your current physical health <ul style="list-style-type: none"> <li>○ Daily energy levels</li> <li>○ Cancer ‘commitments’</li> </ul> </li> </ul> |
| Physical<br>Activity                 | <p>What does your current physical activity engagement look like?</p> <ul style="list-style-type: none"> <li>○ Do you participate in regular physical activity?</li> <li>○ How often? Is it consistent each week?</li> <li>○ <b>Preferred</b> physical activity modes?</li> <li>- Describe what your physical activity engagement looked like across your lifespan [briefly]?</li> <li>- How has your physical activity engagement changed throughout your cancer journey?</li> </ul>                                                                                                                                                                                               |

|                     |                                                                                                                                                                                                                                                                                                                                                                                                                                                                                                                                                                                                                                                                                                                                                                                                                                                                                                                                                                                                                                                                                                                                                                                                                                                                                                                                                                                            |
|---------------------|--------------------------------------------------------------------------------------------------------------------------------------------------------------------------------------------------------------------------------------------------------------------------------------------------------------------------------------------------------------------------------------------------------------------------------------------------------------------------------------------------------------------------------------------------------------------------------------------------------------------------------------------------------------------------------------------------------------------------------------------------------------------------------------------------------------------------------------------------------------------------------------------------------------------------------------------------------------------------------------------------------------------------------------------------------------------------------------------------------------------------------------------------------------------------------------------------------------------------------------------------------------------------------------------------------------------------------------------------------------------------------------------|
|                     | <ul style="list-style-type: none"> <li>- Explain to me what motivates you to engage in physical activity? <ul style="list-style-type: none"> <li>o Skip if no physical activity completed</li> </ul> </li> <li>- Do you think engaging in PA during cancer treatment is important? <ul style="list-style-type: none"> <li>o Do you think it impacts your recovery?</li> </ul> </li> <li>- Explain, if any, your perceived <b>barriers</b> to physical activity? <ul style="list-style-type: none"> <li>o <b>Cancer related</b></li> <li>o Non-cancer related (if deemed important / relevant)</li> </ul> </li> <li>- Explain, if applicable, how your cancer has interfered with your ability to do physical activity? <ul style="list-style-type: none"> <li>o <b>Energy levels</b></li> <li>o Specific cancer / treatment side effects</li> </ul> </li> </ul>                                                                                                                                                                                                                                                                                                                                                                                                                                                                                                                            |
| Bike / E-bike usage | <p>Describe to me your current understanding of an e-bike</p> <ul style="list-style-type: none"> <li>o What is it?</li> <li>o What they're used for?</li> <li>o Benefits / limitations compared to normal cycling?</li> <li>o Do you know anyone with an e-bike? If so, what is their perception?</li> </ul> <p><b>Explain what an e-bike is</b></p> <ul style="list-style-type: none"> <li>- An e-bike is an electronic bike <ul style="list-style-type: none"> <li>o bicycles with a battery-powered "assist" that comes via pedalling</li> <li>o Can help when cycling up hills</li> <li>o Make pedalling easier</li> </ul> </li> <li>- Some come with a motor by the press of a button</li> <li>- Research has found people cycle further and more regularly (Castro et al., 2019)</li> </ul> <p>Describe your current cycling engagement</p> <ul style="list-style-type: none"> <li>- Do you cycle? If so, how often?</li> <li>- <b>Have you previously used an e-bike or regular bicycle?</b> <ul style="list-style-type: none"> <li>o Do you own one or loaned one?</li> </ul> </li> </ul> <p>Why did you agree to take part in this research?</p> <p>Initial thoughts / opinions of e-cycling</p> <ul style="list-style-type: none"> <li>- Does it interest you?</li> <li>- Perceived ease of use during cancer treatment</li> <li>- E-cycling vs conventional cycling?</li> </ul> |

|                              |                                                                                                                                                                                                                                              |
|------------------------------|----------------------------------------------------------------------------------------------------------------------------------------------------------------------------------------------------------------------------------------------|
|                              | Ask for any <b>generic comments</b> about e-cycling                                                                                                                                                                                          |
| E-cycling taster session     | <p>Discuss the process of the 1-hour e-cycling taster session</p> <ul style="list-style-type: none"> <li>- Arrange a date / time if not already done so</li> <li>- Explain that more information will be provided nearer the time</li> </ul> |
| Final comments and thank you | <ul style="list-style-type: none"> <li>- Please specify any other comments you wish to add?</li> <li>- Thank you for your time</li> <li>- I hope you enjoy your e-cycling taster session!</li> </ul>                                         |

## TOPIC GUIDE TWO

|                                      |                                                                                                                                                                                                                                                                                                                                                                                                       |
|--------------------------------------|-------------------------------------------------------------------------------------------------------------------------------------------------------------------------------------------------------------------------------------------------------------------------------------------------------------------------------------------------------------------------------------------------------|
| Welcome;<br>introduction;<br>consent | <ul style="list-style-type: none"> <li>- Thank you for taking part</li> <li>- Remind participant that interview is recorded; <b>start recording.</b></li> <li>- Explain purpose of interview: to explore opinions relating to physical activity during cancer treatment, in particular an e-bike intervention</li> <li>- Withdrawal without penalty (except 21 days after final interview)</li> </ul> |
| Warm up                              | <ul style="list-style-type: none"> <li>- Ask about day / plans for the week</li> </ul>                                                                                                                                                                                                                                                                                                                |
| E-cycling taster session             | <p>Question the participant about their 1-hour taster session</p> <ul style="list-style-type: none"> <li>- Tell me about the session</li> <li>- <b>Particular likes / dislikes?</b></li> <li>- How did you find riding the e-bikes?</li> <li>- E-bike compared to conventional bike?</li> </ul> <p><b>Did you have to plan the session around any treatments?</b></p>                                 |
| E-bike Intervention                  | <p>From your experiences using an e-bike:</p> <ul style="list-style-type: none"> <li>- Can you identify any potential benefits of using an e-bike during your cancer journey?</li> <li>- <b>Describe whether you perceive e-cycling to be feasible during your cancer journey?</b></li> </ul>                                                                                                         |

|  |                                                                                                                                                                                                                                                                                                                                                                                                                                                                                                                                                                                                                                                                                                                                                                                                                                                                                                                                                                                                                                                                                                                                                                                                                                                                                                                                                                                                                                                                                                                                                                                                                                                                                                                                                                                                                                                                                                                                                                                                                                                                                                                                                                                                                                               |
|--|-----------------------------------------------------------------------------------------------------------------------------------------------------------------------------------------------------------------------------------------------------------------------------------------------------------------------------------------------------------------------------------------------------------------------------------------------------------------------------------------------------------------------------------------------------------------------------------------------------------------------------------------------------------------------------------------------------------------------------------------------------------------------------------------------------------------------------------------------------------------------------------------------------------------------------------------------------------------------------------------------------------------------------------------------------------------------------------------------------------------------------------------------------------------------------------------------------------------------------------------------------------------------------------------------------------------------------------------------------------------------------------------------------------------------------------------------------------------------------------------------------------------------------------------------------------------------------------------------------------------------------------------------------------------------------------------------------------------------------------------------------------------------------------------------------------------------------------------------------------------------------------------------------------------------------------------------------------------------------------------------------------------------------------------------------------------------------------------------------------------------------------------------------------------------------------------------------------------------------------------------|
|  | <ul style="list-style-type: none"> <li>- Would you have a preference for an e-bike rather than a regular bicycle? <ul style="list-style-type: none"> <li>o If yes/no, why?</li> </ul> </li> <li>- Would an e-bike be easy enough to use during: <ul style="list-style-type: none"> <li>o times of high stress</li> <li>o lacking energy</li> <li>o other barriers to cycling</li> </ul> </li> <li>- <b>Potential reasons for not engaging?</b></li> </ul> <p>Cancer journey</p> <ul style="list-style-type: none"> <li>- Is / was there a time in your cancer journey that you would perceive most difficult to engage in a physical activity intervention? <ul style="list-style-type: none"> <li>o When?</li> <li>o Why?</li> <li>o More specifically, an e-bike intervention?</li> <li>o <b>In these ‘difficult’ times, what is the biggest barrier to exercise?</b></li> </ul> </li> <li>- <b>How does e-cycling compare to other modes of physical activity you have done previously?</b></li> <li>- Describe a time during your cancer journey that would be feasible to engage in an e-bike intervention? <ul style="list-style-type: none"> <li>o Pre-treatment? During treatment? Post-treatment? At what point post-treatment?</li> </ul> </li> <li>- If you had access to an e-bike would you consider using it instead of a car or public transport. <ul style="list-style-type: none"> <li>o Under what circumstance?</li> <li>o Would you use it for commuting for chores/shopping?</li> <li>o Would you use it for leisure PA?</li> <li>o Would you use it for anything else?</li> </ul> </li> <li>- Do you think you would like to monitor your e-cycling activity? <ul style="list-style-type: none"> <li>o If so, would a paper diary or activity tracking watch be better?</li> </ul> </li> <li>- Interviewer to give a brief overview of what an e-bike intervention might involve. Explain whether an e-bike intervention sounds like something you would be interested in trying. <ul style="list-style-type: none"> <li>o If yes/no, why?</li> <li>o What would you want from the study?</li> <li>o What would motivate you to take part?</li> </ul> </li> </ul> <p>Speak freely about the intervention in general</p> |
|--|-----------------------------------------------------------------------------------------------------------------------------------------------------------------------------------------------------------------------------------------------------------------------------------------------------------------------------------------------------------------------------------------------------------------------------------------------------------------------------------------------------------------------------------------------------------------------------------------------------------------------------------------------------------------------------------------------------------------------------------------------------------------------------------------------------------------------------------------------------------------------------------------------------------------------------------------------------------------------------------------------------------------------------------------------------------------------------------------------------------------------------------------------------------------------------------------------------------------------------------------------------------------------------------------------------------------------------------------------------------------------------------------------------------------------------------------------------------------------------------------------------------------------------------------------------------------------------------------------------------------------------------------------------------------------------------------------------------------------------------------------------------------------------------------------------------------------------------------------------------------------------------------------------------------------------------------------------------------------------------------------------------------------------------------------------------------------------------------------------------------------------------------------------------------------------------------------------------------------------------------------|

|                                       |                                                                                                                                          |
|---------------------------------------|------------------------------------------------------------------------------------------------------------------------------------------|
| Final<br>comments<br>and thank<br>you | <ul style="list-style-type: none"><li>- Please specify any other comments you wish to add?</li><li>- Thank you for taking part</li></ul> |
|---------------------------------------|------------------------------------------------------------------------------------------------------------------------------------------|
